# Supplementary material for: Exploring Categorical Learning in Fish: Semantic Discrimination of Visual Stimuli in Danio rerio and Xenotoca eiseni
Source: Research Square preprint supplement (doi:10.21203/rs.3.rs-6915298/v1), 2025-06-26
Supplement: Supplementary file 1 [file 59a4f90c9afe6e036e46fe0f.xlsx]

## Sheet: Foglio1
fish	species	stimulus_rewarded	trials_to_learn	correct_first_learning_freq	incorrect_first_learning_freq	success_index_first_learning	correct_tot_learning_freq	incorrect_tot_learning_freq	success_index_tot_learning	correct_first_validation_freq	incorrect_first_validation_freq	success_index_first_validation	correct_tot_validation_freq	incorrect_tot_validation_freq	success_index_tot_validation	correct_first_test_freq_all	incorrect_first_test_freq_all	success_index_first_test_all	TEST_index_correct_first_ABS	correct_tot_test_freq_all	incorrect_tot_test_freq_all	success_index_tot_test_all	TEST_index_correct_tot_ABS	correct_first_test_freq_60s	incorrect_first_test_freq_60s	success_index_first_test_60s	correct_tot_test_freq_60s	incorrect_tot_test_freq_60s	success_index_tot_test_60s	correct_first_test_freq_30s	incorrect_first_test_freq_30s	success_index_first_test_30s	correct_tot_test_freq_30s	incorrect_tot_test_freq_30s	success_index_tot_test_30s	time_till_learning	TEST_local_corner_first	TEST_opposite_corner_first	TEST_index_local_first	TEST_index_local_first_ABS	TEST_local_corner_tot	TEST_opposite_corner_tot	TEST_index_local_tot	TEST_index_local_tot_ABS	TEST_correct_WF_first	TEST_correct_CC_first	TEST_correct_WFL_first	TEST_correct_WFR_first	TEST_correct_WF_tot
1	1	1	30	7	3	0.7	13	5	0.722222	7	3	0.7	11	4	0.733333	8	2	0.8	0.8	33	37	0.471429	0.528571	8	2	0.8	21	19	0.525	6	1	0.857143	11	8	0.578947	3688	6	4	0.6	0.6	22	19	0.536585	0.536585	0	1	0	0	0
2	1	2	30	7	1	0.875	7	1	0.875	7	3	0.7	10	3	0.769231	4	6	0.4	0.6	7	10	0.411765	0.588235	0	2	0	0	2	0	0	1	0	0	1	0	3358	4	6	0.4	0.6	8	8	0.5	0.5	0	1	0	0	0
3	1	1	30	9	1	0.9	10	2	0.833333	7	3	0.7	10	3	0.769231	2	8	0.2	0.8	15	25	0.375	0.625	1	7	0.125	6	11	0.352941	1	6	0.142857	1	9	0.1	1613	7	3	0.7	0.7	36	36	0.5	0.5	0	1	0	0	0
4	1	2	90	7	3	0.7	10	3	0.769231	10	0	1	11	0	1	4	6	0.4	0.6	20	21	0.487805	0.512195	3	6	0.333333	10	14	0.416667	2	4	0.333333	4	5	0.444444	16354	5	5	0.5	0.5	21	20	0.512195	0.512195	0	1	0	0	0
5	1	1	120	7	3	0.7	10	3	0.769231	8	2	0.8	10	2	0.833333	6	4	0.6	0.6	34	38	0.472222	0.527778	6	4	0.6	19	20	0.487179	6	4	0.6	12	12	0.5	3059	7	3	0.7	0.7	40	32	0.555556	0.555556	0.67	0.33	0.5	0.5	0
6	1	2	30	8	2	0.8	10	4	0.714286	8	2	0.8	10	2	0.833333	3	7	0.3	0.7	28	43	0.394366	0.605634	3	7	0.3	12	22	0.352941	2	7	0.222222	6	11	0.352941	1679	5	5	0.5	0.5	39	32	0.549296	0.549296	0.33	0.67	1	0	0
7	1	1	20	8	2	0.8	11	2	0.846154	10	0	1	10	0	1	7	3	0.7	0.7	16	11	0.592593	0.592593	5	3	0.625	9	4	0.692308	3	1	0.75	3	1	0.75	827	8	2	0.8	0.8	20	6	0.769231	0.769231	0.29	0.71	1	0	0
8	1	2	40	7	3	0.7	11	6	0.647059	8	2	0.8	10	2	0.833333	4	6	0.4	0.6	15	20	0.428571	0.571429	3	5	0.375	6	12	0.333333	2	3	0.4	2	4	0.333333	5672	7	3	0.7	0.7	27	8	0.771429	0.771429	0	1	0	0	0
9	1	1	40	10	0	1	11	0	1	7	3	0.7	10	6	0.625	4	6	0.4	0.6	20	13	0.606061	0.606061	3	4	0.428571	8	5	0.615385	1	1	0.5	1	1	0.5	9380	9	1	0.9	0.9	22	11	0.666667	0.666667	0	1	0	0	0
10	1	2	160	7	3	0.7	11	4	0.733333	9	1	0.9	15	4	0.789474	4	6	0.4	0.6	30	24	0.555556	0.555556	2	6	0.25	11	15	0.423077	1	4	0.2	3	4	0.428571	14235	5	5	0.5	0.5	27	27	0.5	0.5	0.75	0.25	0.67	0.33	0
1	2	2	30	7	3	0.7	10	3	0.769231	7	3	0.7	10	4	0.714286	6	4	0.6	0.6	26	30	0.464286	0.535714	6	4	0.6	26	30	0.464286	6	3	0.666667	12	14	0.461538	1164	8	2	0.8	0.8	38	18	0.678571	0.678571	0.16	0.84	1	0	0
2	2	1	30	8	2	0.8	10	3	0.769231	9	1	0.9	10	2	0.833333	4	6	0.4	0.6	26	32	0.448276	0.551724	4	6	0.4	26	32	0.448276	4	5	0.444444	9	16	0.36	672	9	1	0.9	0.9	36	22	0.62069	0.62069	0.25	0.75	1	0	0
3	2	2	270	8	2	0.8	10	2	0.833333	8	2	0.8	10	2	0.833333	5	5	0.5	0.5	16	16	0.5	0.5	5	5	0.5	16	16	0.5	5	4	0.555556	8	8	0.5	995	8	2	0.8	0.8	20	12	0.625	0.625	0.2	0.8	1	0	0
4	2	1	260	9	1	0.9	10	1	0.909091	9	1	0.9	10	1	0.909091	4	6	0.4	0.6	11	17	0.392857	0.607143	4	6	0.4	11	17	0.392857	2	5	0.285714	6	6	0.5	1080	5	5	0.5	0.5	18	10	0.642857	0.642857	0.75	0.25	0.33	0.67	0
5	2	2	153	7	3	0.7	10	3	0.769231	7	3	0.7	10	3	0.769231	6	4	0.6	0.6	23	20	0.534884	0.534884	6	4	0.6	23	20	0.534884	6	3	0.666667	12	11	0.521739	3379	3	6	0.333333	0.666667	15	28	0.348837	0.651163	0.33	0.67	1	0	0
6	2	1	123	7	3	0.7	10	4	0.714286	10	0	1	10	0	1	3	7	0.3	0.7	34	36	0.485714	0.514286	3	7	0.3	34	36	0.485714	3	7	0.3	11	16	0.407407	6960	6	4	0.6	0.6	37	33	0.528571	0.528571	0	1	0	0	0
7	2	2	74	8	2	0.8	10	4	0.714286	7	3	0.7	10	5	0.666667	7	3	0.7	0.7	24	22	0.521739	0.521739	7	3	0.7	24	22	0.521739	7	3	0.7	12	9	0.571429	1193	6	4	0.6	0.6	27	19	0.586957	0.586957	0	1	0	0	0
[truncated: 11 more columns]
