# Supplementary material for: Exploring Categorical Learning in Fish: Semantic Discrimination of Visual Stimuli in Danio rerio and Xenotoca eiseni
Source: Research Square preprint supplement (doi:10.21203/rs.3.rs-6915298/v1), 2025-06-26
Supplement: Supplementary file 2 [file 90b573ac37200b1fb8b4e467.xlsx]

## Sheet: conceptual_learning_G0
fish	species	stimulus_rewarded	trials_to_learn	correct_first_learning_freq	incorrect_first_learning_freq	success_index_first_learning	correct_tot_learning_freq	incorrect_tot_learning_freq	success_index_tot_learning	correct_first_validation_freq	incorrect_first_validation_freq	success_index_first_validation	correct_tot_validation_freq	incorrect_tot_validation_freq	success_index_tot_validation	correct_first_test_freq_all	incorrect_first_test_freq_all	success_index_first_test_all	success_index_first_test_all_ABS	correct_tot_test_freq_all	incorrect_tot_test_freq_all	success_index_tot_test_all	success_index_tot_test_all_ABS	correct_first_test_freq_60s	incorrect_first_test_freq_60s	success_index_first_test_60s	success_index_first_test_60s_ABS	correct_tot_test_freq_60s	incorrect_tot_test_freq_60s	success_index_tot_test_60s	success_index_tot_test_60s_ABS	correct_first_test_freq_30s	incorrect_first_test_freq_30s	success_index_first_test_30s	success_index_first_test_30s_ABS	correct_tot_test_freq_30s	incorrect_tot_test_freq_30s	success_index_tot_test_30s	success_index_tot_test_30s_ABS	time_till_learning	correct_first_learning_perc	incorrect_first_learning_perc	correct_tot_learning_perc	incorrect_tot_learning_perc	correct_first_validation_perc	incorrect_first_validation_perc	correct_tot_validation_perc	incorrect_tot_validation_perc	correct_first_test_perc_all
1	1	1	40	8	2	0.8	10	3	0.769231	7	3	0.7	10	3	0.769231	3	7	0.3	0.7	23	29	0.442308	0.557692	3	6	0.333333	0.666667	12	12	0.5	0.5	1	1	0.5	0.5	2	1	0.666667	0.67	2432	80	20	76.9231	23.0769	70	30	76.9231	23.0769	30
2	1	2	20	10	0	1	10	0	1	8	2	0.8	10	3	0.769231	5	5	0.5	0.5	25	25	0.5	0.5	4	5	0.444444	0.555556	9	12	0.428571	0.571429	3	3	0.5	0.5	4	5	0.444444	0.555556	520	100	0	100	0	80	20	76.9231	23.0769	50
3	1	1	20	7	3	0.7	10	4	0.714286	7	3	0.7	10	3	0.769231	6	4	0.6	0.6	32	35	0.477612	0.522388	6	4	0.6	0.6	21	23	0.477273	0.522727	6	1	0.857143	0.857143	6	2	0.75	0.75	685	70	30	71.4286	28.5714	70	30	76.9231	23.0769	60
4	1	2	20	8	2	0.8	10	2	0.833333	7	3	0.7	10	5	0.666667	6	4	0.6	0.6	34	26	0.566667	0.57	5	4	0.555556	0.555556	12	14	0.461538	0.538462	6	3	0.666667	0.666667	11	9	0.55	0.55	765	80	20	83.3333	16.6667	70	30	66.6667	33.3333	60
5	1	1	40	7	3	0.7	10	3	0.769231	7	3	0.7	10	3	0.769231	5	5	0.5	0.5	33	35	0.485294	0.514706	5	4	0.555556	0.555556	15	15	0.5	0.5	2	5	0.285714	0.714286	7	10	0.411765	0.588235	2108	70	30	76.9231	23.0769	70	30	76.9231	23.0769	50
6	1	2	140	8	2	0.8	10	2	0.833333	8	2	0.8	10	2	0.833333	6	4	0.6	0.6	38	33	0.535211	0.535211	6	4	0.6	0.6	19	15	0.558824	0.558824	4	4	0.5	0.5	8	8	0.5	0.5	4826	80	20	83.3333	16.6667	80	20	83.3333	16.6667	60
7	1	1	50	7	3	0.7	10	4	0.714286	9	1	0.9	10	1	0.909091	6	4	0.6	0.6	10	5	0.666667	0.666667	2	1	0.666667	0.666667	3	2	0.6	0.6	2	3	0.4	0.6	4	5	0.444444	0.555556	2518	70	30	71.4286	28.5714	90	10	90.9091	9.09091	60
8	1	2	24	8	2	0.8	10	3	0.769231	7	3	0.7	10	4	0.714286	8	2	0.8	0.8	23	14	0.621622	0.621622	4	2	0.666667	0.666667	9	8	0.529412	0.529412	0	1	0	1	0	1	0	1	2630	80	20	76.9231	23.0769	70	30	71.4286	28.5714	80
9	1	1	50	8	2	0.8	10	2	0.833333	7	3	0.7	10	3	0.769231	5	5	0.5	0.5	34	33	0.507463	0.507463	3	3	0.5	0.5	10	11	0.47619	0.52381	1	2	0.333333	0.666667	1	2	0.333333	0.666667	5345	80	20	83.3333	16.6667	70	30	76.9231	23.0769	50
10	1	2	95	7	3	0.7	10	4	0.714286	7	3	0.7	10	3	0.769231	3	7	0.3	0.7	48	57	0.457143	0.542857	3	7	0.3	0.7	23	32	0.418182	0.581818	1	2	0.333333	0.666667	1	3	0.25	0.75	4767	70	30	71.4286	28.5714	70	30	76.9231	23.0769	30
11	1	1	81	7	3	0.7	10	4	0.714286	9	1	0.9	10	1	0.909091	3	7	0.3	0.7	24	20	0.545455	0.545455	2	7	0.222222	0.777778	9	10	0.473684	0.526316	0	1	0	1	1	1	0.5	0.5	15605	70	30	71.4286	28.5714	90	10	90.9091	9.09091	30
12	1	2	23	6	0	1	6	0	1	9	1	0.9	10	1	0.909091	6	4	0.6	0.6	18	4	0.818182	0.818182	2	2	0.5	0.5	5	3	0.625	0.63	3	1	0.75	0.75	4	3	0.571429	0.57	5355	100	0	100	0	90	10	90.9091	9.09091	60
1	2	1	282	8	2	0.8	10	2	0.833333	6	4	0.6	10	4	0.714286	6	4	0.6	0.6	26	27	0.490566	0.509434	6	4	0.6	0.6	26	27	0.490566	0.509434	5	5	0.5	0.5	10	15	0.4	0.6	5867	80	20	83.3333	16.6667	60	40	71.4286	28.5714	60
2	2	2	110	7	3	0.7	10	3	0.769231	7	3	0.7	10	4	0.714286	7	3	0.7	0.7	20	20	0.5	0.5	7	3	0.7	0.7	20	20	0.5	0.5	4	2	0.666667	0.666667	7	6	0.538462	0.54	5105	70	30	76.9231	23.0769	70	30	71.4286	28.5714	70
4	2	1	40	8	2	0.8	10	4	0.714286	7	3	0.7	10	4	0.714286	3	7	0.3	0.7	31	34	0.476923	0.523077	3	7	0.3	0.7	31	34	0.476923	0.523077	3	7	0.3	0.7	17	21	0.447368	0.552632	1594	80	20	71.4286	28.5714	70	30	71.4286	28.5714	30
5	2	2	60	8	2	0.8	10	2	0.833333	8	2	0.8	10	2	0.833333	3	7	0.3	0.7	32	40	0.444444	0.555556	3	7	0.3	0.7	32	40	0.444444	0.555556	3	6	0.333333	0.666667	16	20	0.444444	0.555556	1532	80	20	83.3333	16.6667	80	20	83.3333	16.6667	30
7	2	2	69	7	3	0.7	10	5	0.666667	8	2	0.8	10	2	0.833333	8	2	0.8	0.8	30	22	0.576923	0.576923	8	2	0.8	0.8	30	22	0.576923	0.576923	7	2	0.777778	0.78	11	5	0.6875	0.69	3117	70	30	66.6667	33.3333	80	20	83.3333	16.6667	80
8	2	1	60	8	2	0.8	10	2	0.833333	9	1	0.9	10	1	0.909091	6	4	0.6	0.6	13	9	0.590909	0.590909	6	4	0.6	0.6	13	9	0.590909	0.590909	1	2	0.333333	0.666667	1	3	0.25	0.75	5130	80	20	83.3333	16.6667	90	10	90.9091	9.09091	60
9	2	2	167	9	1	0.9	10	1	0.909091	8	2	0.8	10	2	0.833333	5	5	0.5	0.5	9	7	0.5625	0.5625	5	5	0.5	0.5	9	7	0.5625	0.5625	0	0			0	0			11274	90	10	90.9091	9.09091	80	20	83.3333	16.6667	50
10	2	1	109	7	3	0.7	10	5	0.666667	9	1	0.9	10	1	0.909091	5	5	0.5	0.5	15	14	0.517241	0.517241	5	5	0.5	0.5	15	14	0.517241	0.517241	3	1	0.75	0.75	4	1	0.8	0.8	9898	70	30	66.6667	33.3333	90	10	90.9091	9.09091	50
11	2	2	20	7	3	0.7	10	4	0.714286	10	0	1	10	0	1	5	5	0.5	0.5	9	8	0.529412	0.529412	5	5	0.5	0.5	9	8	0.529412	0.529412	2	1	0.666667	0.666667	2	1	0.666667	0.666667	1472	70	30	71.4286	28.5714	100	0	100	0	50
12	2	1	166	8	2	0.8	10	4	0.714286	8	2	0.8	10	3	0.769231	5	5	0.5	0.5	8	8	0.5	0.5	5	5	0.5	0.5	8	8	0.5	0.5	1	0	1	1	1	0	1	1	14039	80	20	71.4286	28.5714	80	20	76.9231	23.0769	50
13	2	2	206	7	3	0.7	10	3	0.769231	9	1	0.9	10	1	0.909091																									13298	70	30	76.9231	23.0769	90	10	90.9091	9.09091
3	2	2
6	2	2
[truncated: 41 more columns]
