# Supplementary material for: Exploring Categorical Learning in Fish: Semantic Discrimination of Visual Stimuli in Danio rerio and Xenotoca eiseni
Source: Research Square preprint supplement (doi:10.21203/rs.3.rs-6915298/v1), 2025-06-26
Supplement: Supplementary file 3 [file f4b257cc09d6aeacb42fc750.xlsx]

## Sheet: conceptual_learning_A2
fish	species	stimulus_rewarded	trials_to_learn	correct_first_learning_freq	incorrect_first_learning_freq	success_index_first_learning	correct_tot_learning_freq	incorrect_tot_learning_freq	success_index_tot_learning	correct_first_validation_freq	incorrect_first_validation_freq	success_index_first_validation	correct_tot_validation_freq	incorrect_tot_validation_freq	success_index_tot_validation	correct_first_test_freq_all	incorrect_first_test_freq_all	success_index_first_test_all	success_index_first_test_all_ABS	correct_tot_test_freq_all	incorrect_tot_test_freq_all	success_index_tot_test_all	success_index_tot_test_all_ABS	correct_first_test_freq_60s	incorrect_first_test_freq_60s	success_index_first_test_60s	success_index_first_test_60s_ABS	correct_tot_test_freq_60s	incorrect_tot_test_freq_60s	success_index_tot_test_60s	success_index_tot_test_60s_ABS	correct_first_test_freq_30s	incorrect_first_test_freq_30s	success_index_first_test_30s	success_index_first_test_30s_ABS	correct_tot_test_freq_30s	incorrect_tot_test_freq_30s	success_index_tot_test_30s	success_index_tot_test_30s_ABS	time_till_learning	correct_first_learning_perc	incorrect_first_learning_perc	correct_tot_learning_perc	incorrect_tot_learning_perc	correct_first_validation_perc	incorrect_first_validation_perc	correct_tot_validation_perc	incorrect_tot_validation_perc	correct_first_test_perc_all
1	1	1	21	7	0	1	7	0	1	6	0	1	6	0	1	6	4	0.6	0.6	17	13	0.566667	0.57	3	2	0.6	0.6	6	4	0.6	0.6	2	5	0.285714	0.714286	2	5	0.285714	0.714286	9015	100	0	100	0	100	0	100	0	60
2	1	2	40	9	1	0.9	10	2	0.833333	8	2	0.8	10	3	0.769231	5	5	0.5	0.5	15	22	0.405405	0.594595	4	4	0.5	0.5	5	10	0.333333	0.666667	3	6	0.333333	0.666667	6	8	0.428571	0.571429	3922	90	10	83.3333	16.6667	80	20	76.9231	23.0769	50
3	1	1	20	7	3	0.7	11	4	0.733333	7	3	0.7	10	3	0.769231	9	1	0.9	0.9	25	17	0.595238	0.6	7	1	0.875	0.875	12	7	0.631579	0.631579	6	7	0.461538	0.538462	12	10	0.545455	0.545455	3607	70	30	73.3333	26.6667	70	30	76.9231	23.0769	90
4	1	2	240	7	3	0.7	10	3	0.769231	7	3	0.7	10	4	0.714286	7	3	0.7	0.7	29	31	0.483333	0.516667	6	3	0.666667	0.666667	17	13	0.566667	0.566667	4	3	0.571429	0.57	7	5	0.583333	0.583333	2910	70	30	76.9231	23.0769	70	30	71.4286	28.5714	70
5	1	2	90	8	2	0.8	10	2	0.833333	8	2	0.8	10	2	0.833333	3	7	0.3	0.7	20	25	0.444444	0.555556	3	5	0.375	0.625	11	12	0.478261	0.521739	2	3	0.4	0.6	7	5	0.583333	0.583333	2136	80	20	83.3333	16.6667	80	20	83.3333	16.6667	30
6	1	1	107	7	3	0.7	11	5	0.6875	7	3	0.7	11	5	0.6875	4	6	0.4	0.6	32	39	0.450704	0.549296	1	0	1	1	4	0	1	1	4	3	0.571429	0.571429	9	6	0.6	0.6	18868	70	30	68.75	31.25	70	30	68.75	31.25	40
7	1	1	90	8	2	0.8	10	2	0.833333	8	2	0.8	10	2	0.833333	4	6	0.4	0.6	21	19	0.525	0.525	3	3	0.5	0.5	12	6	0.666667	0.666667	2	0	1	1	3	0	1	1	1866	80	20	83.3333	16.6667	80	20	83.3333	16.6667	40
8	1	2	20	9	1	0.9	10	1	0.909091	8	2	0.8	10	4	0.714286	6	4	0.6	0.6	8	8	0.5	0.5	0	1	0	1	0	2	0	1	3	1	0.75	0.75	4	2	0.666667	0.666667	1915	90	10	90.9091	9.09091	80	20	71.4286	28.5714	60
9	1	1	20	8	2	0.8	10	2	0.833333	10	0	1	10	0	1	3	7	0.3	0.7	9	17	0.346154	0.653846	1	5	0.166667	0.833333	4	8	0.333333	0.666667	3	1	0.75	0.75	4	2	0.666667	0.666667	3480	80	20	83.3333	16.6667	100	0	100	0	30
10	1	2	20	8	2	0.8	10	2	0.833333	7	3	0.7	10	4	0.714286	2	8	0.2	0.8	15	25	0.375	0.625	2	6	0.25	0.75	4	14	0.222222	0.777778	3	7	0.3	0.7	8	16	0.333333	0.666667	3610	80	20	83.3333	16.6667	70	30	71.4286	28.5714	20
11	1	1	54	8	2	0.8	10	3	0.769231	7	3	0.7	11	5	0.6875	5	5	0.5	0.5	25	24	0.510204	0.510204	2	2	0.5	0.5	4	3	0.571429	0.57	1	2	0.333333	0.666667	3	3	0.5	0.5	8365	80	20	76.9231	23.0769	70	30	68.75	31.25	50
12	1	2	262	8	2	0.8	10	3	0.769231	7	3	0.7	10	4	0.714286	7	3	0.7	0.7	24	26	0.48	0.52	5	1	0.833333	0.833333	9	10	0.473684	0.526316	0	2	0	1	0	2	0	1	22892	80	20	76.9231	23.0769	70	30	71.4286	28.5714	70
1	2	1	230	7	3	0.7	10	3	0.769231	7	3	0.7	10	4	0.714286	5	5	0.5	0.5	21	23	0.477273	0.522727	5	5	0.5	0.5	21	23	0.477273	0.522727	5	5	0.5	0.5	10	8	0.555556	0.56	9385	70	30	76.9231	23.0769	70	30	71.4286	28.5714	50
2	2	2	20	8	2	0.8	10	2	0.833333	8	2	0.8	10	5	0.666667	6	4	0.6	0.6	17	16	0.515152	0.52	6	4	0.6	0.6	17	16	0.515152	0.52	2	3	0.4	0.6	4	5	0.444444	0.555556	720	80	20	83.3333	16.6667	80	20	66.6667	33.3333	60
3	2	1	50	9	1	0.9	10	1	0.909091	7	3	0.7	10	3	0.769231	3	7	0.3	0.7	26	28	0.481481	0.518519	3	7	0.3	0.7	26	28	0.481481	0.518519	3	7	0.3	0.7	15	11	0.576923	0.576923	3490	90	10	90.9091	9.09091	70	30	76.9231	23.0769	30
5	2	2	180	7	3	0.7	10	3	0.769231	7	3	0.7	11	6	0.647059	3	7	0.3	0.7	41	43	0.488095	0.511905	3	7	0.3	0.7	41	43	0.488095	0.511905	3	7	0.3	0.7	22	22	0.5	0.5	2723	70	30	76.9231	23.0769	70	30	64.7059	35.2941	30
6	2	1	120	8	2	0.8	10	3	0.769231	9	1	0.9	10	1	0.909091	8	2	0.8	0.8	17	14	0.548387	0.55	8	2	0.8	0.8	17	14	0.548387	0.55	2	0	1	1	5	1	0.833333	0.833333	2794	80	20	76.9231	23.0769	90	10	90.9091	9.09091	80
7	2	2	70	9	1	0.9	10	2	0.833333	8	2	0.8	10	2	0.833333	3	7	0.3	0.7	3	7	0.3	0.7	3	7	0.3	0.7	3	7	0.3	0.7	3	7	0.3	0.7	15	22	0.405405	0.594595	2059	90	10	83.3333	16.6667	80	20	83.3333	16.6667	30
8	2	2	136	9	1	0.9	10	1	0.909091	7	3	0.7	10	5	0.666667	5	5	0.5	0.5	34	34	0.5	0.5	5	5	0.5	0.5	34	34	0.5	0.5	5	5	0.5	0.5	19	18	0.513514	0.513514	4118	90	10	90.9091	9.09091	70	30	66.6667	33.3333	50
9	2	1	220	7	3	0.7	10	4	0.714286	7	3	0.7	10	3	0.769231	5	5	0.5	0.5	24	22	0.521739	0.521739	5	5	0.5	0.5	24	22	0.521739	0.521739	5	4	0.555556	0.555556	10	8	0.555556	0.555556	7784	70	30	71.4286	28.5714	70	30	76.9231	23.0769	50
11	2	1	160	8	2	0.8	10	3	0.769231	8	2	0.8	10	4	0.714286	6	4	0.6	0.6	36	26	0.580645	0.580645	6	4	0.6	0.6	36	26	0.580645	0.580645	6	3	0.666667	0.666667	12	10	0.545455	0.545455	5977	80	20	76.9231	23.0769	80	20	71.4286	28.5714	60
12	2	2	120	7	3	0.7	11	5	0.6875	9	1	0.9	10	3	0.769231	3	7	0.3	0.7	28	30	0.482759	0.517241	3	7	0.3	0.7	28	30	0.482759	0.517241	2	5	0.285714	0.714286	9	11	0.45	0.55	5490	70	30	68.75	31.25	90	10	76.9231	23.0769	30
13	2	1	90	8	2	0.8	10	3	0.769231	8	2	0.8	12	3	0.8																									6870	80	20	76.9231	23.0769	80	20	80	20
14	2	2	32	10	0	1	25	0	1	10	0	1	16	0	1																									7012	100	0	100	0	100	0	100	0
4	2	1
10	2	2
[truncated: 41 more columns]
